# Supplementary material for: Improving the efficiency of ZnO-based dye-sensitized solar cells by Pr and N co-doping
Source: Royal Society of Chemistry journal article supplement (doi:10.1039/c3ta11570d), 2013-01-01
Supplement: c3ta11570d.pdf [file c3ta11570d.pdf]

supporting information

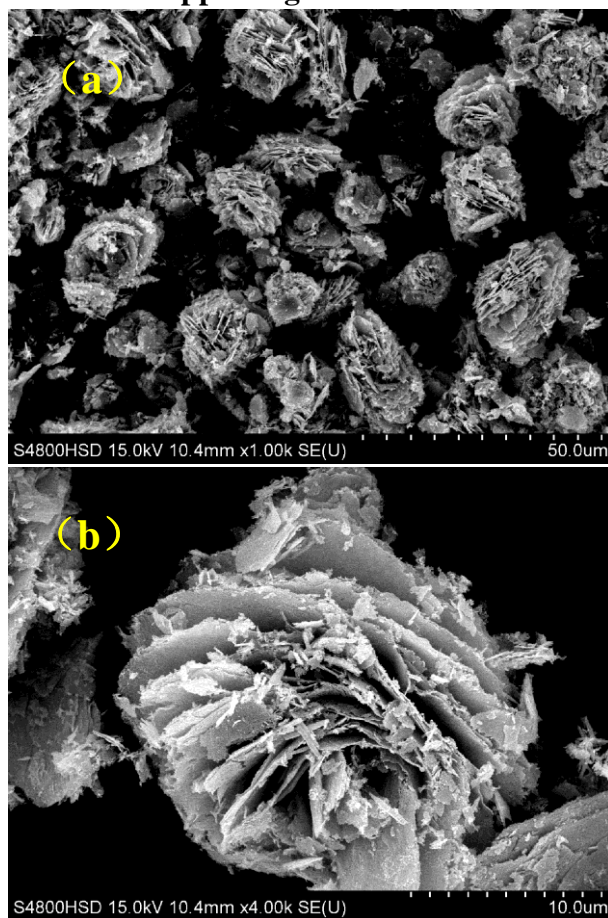

S 1 SEM images of Pr and N co-doped ZnO: (a) high magnification view of the samples;  
(b) typical image of a selected micro-flower architecture.
